# Supplementary material for: Flexible and wearable strain sensor based on electrospun carbon sponge/polydimethylsiloxane composite for human motion detection
Source: Royal Society of Chemistry journal article supplement (doi:10.1039/d0ra09070k), 2021-01-01
Supplement: d0ra09070k1.pdf [file d0ra09070k1.pdf]

---

**Supplementary material**  
**Flexible and Wearable Strain Sensor Based on Electrospun Carbon Sponge/  
Polydimethylsiloxane Composite for Human Motion Detection**

He Gong,<sup>a,b</sup> Chuan Cai,<sup>b</sup> Hongjun Gu,<sup>b</sup> Qiushi Jiang, Daming Zhang,<sup>\* a</sup> and Zhiqiang Cheng<sup>\* c</sup>

<sup>a</sup> State Key Laboratory of Integrated Optoelectronics, College of Electronic Science and Engineering, Jilin University, 2699 Qianjin Street, Changchun 130012, China

<sup>b</sup> College of Information Technology, Jilin Agricultural University, 2888 Xincheng Street, Changchun 130118, China. E-mail: zhangdm@jlu.edu.cn

<sup>c</sup> College of Resources and Environment, Jilin Agriculture University, 2888 Xincheng street, Changchun, 130118, China. E-mail: czq5974@163.com

\*Address correspondence to E-mail: zhangdm@jlu.edu.cn, czq5974@163.com;

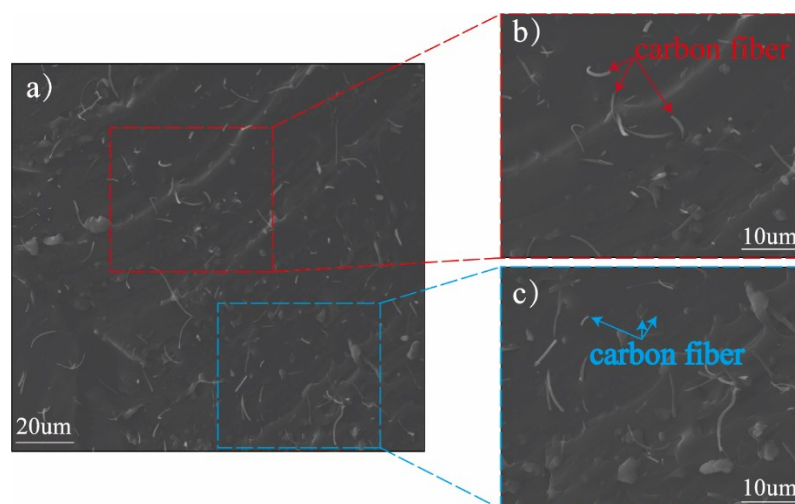

Fig. S1 a) The SEM of the CS/PDMS composite, b) The zoomed-in section of b. c) The zoomed-in section of b.

The fracture surface of the CS/PDMS composite is shown in Fig. S1, carbon fibers are loosely spreading in PDMS and the CS's 3D structure had been well maintained after encapsulation by PDMS.

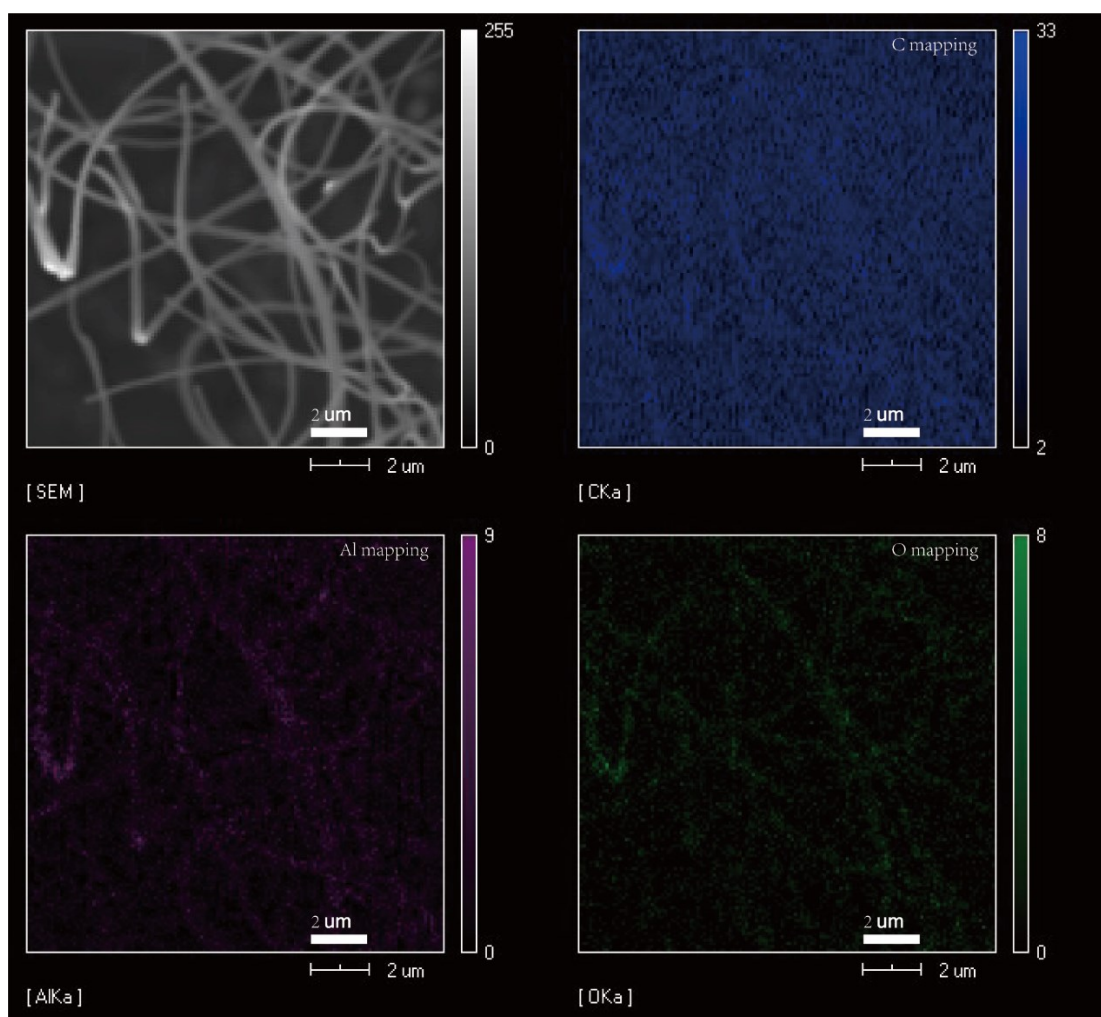

Figure. S2 Corresponding elemental mapping images of the CS surface, which indicates that  $\text{Al}_2\text{O}_3$  is evenly distributed in the carbonized fibers.

#### Supplementary Movie 1

Description: Movie 1 showing the excellent flexibility of CS during pressing and folding.

#### Supplementary Movie 2

Description: Movie 2 detection of wrist joint bending.

#### Supplementary Movie 3

Description: Movie 3 detection of bending angle of index finger.
